# Supplementary material
Source: publisher figshare collection journal article supplement (https://brill.figshare.com/ndownloader/files/24443039)
Supplement: Supplementary file 1 [file 24443039]

## Sheet: Sheet1
Appendix B. Full results of the three linear model series testing individual consistency of behaviors: Between populations, Hayes only, and Waihola only. *Significant interactions P < 0.05 .
	Between Populations						Hayes						Waihola
	df = 34						df = 24						df = 8
	Predictors	Estimate	Standard Error	t-value	P-value		Predictors	Estimate	Standard Error	t-value	P-value		Predictors	Estimate	Standard Error	t-value	P-value
Boldness
	(Intercept)	0.499648	0.165242	3.02373	< 0.001*		(Intercept)	0.487267	0.105357	4.6249	< 0.001*		(Intercept)	0.568663	0.202648	2.80617	0.023*
	Apatemon:Hayes	0.000360408	0.000637173	0.565637	0.575355		Tylodelphys	0.0113127	0.00429032	2.63679	0.014*		Apatemon	0.00105772	0.00641739	0.164821	0.873173
	Apatemon:Waihola	0.00301122	0.00425276	0.708062	0.483733		Apatemon	-0.000463194	0.000593174	-0.780874	0.442512		Telogaster	0.00483184	0.0476658	0.101369	0.921752
	Telogaster:Hayes	0.0296623	0.0278011	1.06695	0.293513		Telogaster	0.0322843	0.0220085	1.4669	0.155386		Stegodexamene	0.0247565	0.0776389	0.318867	0.757994
	Telogaster:Waihola	0.01451	0.0339712	0.427127	0.671979		Stegodexamene	0.0231987	0.0286655	0.809291	0.426299		Length	-0.0699164	0.0970135	-0.720688	0.491621
	Stegodexamene:Hayes	0.0241151	0.0364789	0.661069	0.513023		Length	-0.0118008	0.013738	-0.858992	0.398843		Sex	0.848066	0.508888	1.66651	0.134173
	Stegodexamene:Waihola	-0.0058799	0.0462502	-0.127132	0.899585		Sex	0.227773	0.139232	1.63592	0.114905
	Length:Hayes	0.00429381	0.0159455	0.26928	0.789341
	Length:Waihola	-0.0303083	0.056584	-0.535634	0.595698
	Males:Hayes	0.29157	0.174025	1.67545	0.103021
	Females:Waihola	0.759568	0.367888	2.06467	0.047*
Exploration
	(Intercept)	0.643778	0.168284	3.82554	< 0.001*		(Intercept)	0.624771	0.131638	4.74612	< 0.001*		(Intercept)	0.570538	0.172894	3.29993	0.011*
	Apatemon:Hayes	-0.000803003	0.000648902	-1.23748	0.224387		Tylodelphys	-1.01e-05	0.00536052	-0.00188386	0.998512		Apatemon	0.00494705	0.00547515	0.903546	0.39263
	Apatemon:Waihola	0.00185865	0.00433105	0.429145	0.670525		Apatemon	-0.000830284	0.000741137	-1.12028	0.273679		Telogaster	0.0188129	0.0406672	0.462607	0.655969
	Telogaster:Hayes	0.0178722	0.0283129	0.631241	0.532104		Telogaster	0.012707	0.0274985	0.4621	0.648171		Stegodexamene	-0.0606475	0.0662396	-0.915577	0.386654
	Telogaster:Waihola	0.00351208	0.0345966	0.101515	0.919738		Stegodexamene	-0.0393219	0.0358159	-1.09789	0.283146		Length	0.0630655	0.0827694	0.761942	0.46796
	Stegodexamene:Hayes	-0.0368132	0.0371505	-0.990921	0.328724		Length	0.0231332	0.0171648	1.34771	0.190338		Sex	0.187459	0.434171	0.431763	0.677314
	Stegodexamene:Waihola	-0.0122125	0.0471016	-0.25928	0.796983		Sex	0.0415783	0.173963	0.239007	0.81313
	Length:Hayes	0.0205636	0.016239	1.26631	0.214011
	Length:Waihola	0.000446603	0.0576256	0.00775008	0.993862
	Males:Hayes	0.000885739	0.177229	0.00499771	0.996042
	Females:Waihola	0.32737	0.374661	0.873778	0.388369
Activity
	(Intercept)	0.507676	0.150606	3.37088	0.002*		(Intercept)	0.544087	0.104308	5.21616	< 0.001*		(Intercept)	0.396708	0.185192	2.14214	0.0645604
	Apatemon:Hayes	-0.000522746	0.000580736	-0.900144	0.374375		Tylodelphys	4.84e-05	0.00424758	0.0113888	0.991007		Apatemon	0.00457564	0.00586461	0.780212	0.457727
	Apatemon:Waihola	0.00145851	0.00387608	0.376286	0.709042		Apatemon	-0.000554636	0.000587265	-0.94444	0.354356		Telogaster	0.0165947	0.0435599	0.380961	0.713149
	Telogaster:Hayes	0.0196656	0.0253387	0.77611	0.44305		Telogaster	0.014449	0.0217893	0.663124	0.51357		Stegodexamene	-0.00472775	0.0709513	-0.0666337	0.948508
	Telogaster:Waihola	0.00115151	0.0309623	0.0371908	0.97055		Stegodexamene	-0.0631837	0.0283799	-2.22635	0.036*		Length	0.0760344	0.0886569	0.857625	0.416051
	Stegodexamene:Hayes	-0.0606387	0.0332479	-1.82384	0.0769772		Length	0.0334235	0.0136011	2.45741	0.022*		Sex	0.487368	0.465054	1.04798	0.325273
	Stegodexamene:Waihola	0.0441576	0.0421537	1.04754	0.302241		Sex	0.0849454	0.137845	0.616237	0.543539
	Length:Hayes	0.030905	0.0145331	2.12652	0.041*
	Length:Waihola	0.0128331	0.0515721	0.248839	0.804983
	Males:Hayes	0.0440716	0.158611	0.277859	0.782803
	Females:Waihola	0.628581	0.335303	1.87466	0.0694513
Aggression
	(Intercept)	0.285418	0.245125	1.16438	0.252376		(Intercept)	0.290574	0.16655	1.74467	0.0938377		(Intercept)	0.729961	0.274241	2.66175	0.029*
	Apatemon:Hayes	0.000460913	0.000945198	0.487636	0.628937		Tylodelphys	0.0182421	0.00678216	2.68972	0.013*		Apatemon	0.00856855	0.00868459	0.986638	0.352717
	Apatemon:Waihola	0.00658025	0.00630866	1.04305	0.304285		Apatemon	-0.000913813	0.000937692	-0.974535	0.339512		Telogaster	-0.0262614	0.0645057	-0.407118	0.694596
	Telogaster:Hayes	-0.0313499	0.0412409	-0.760165	0.452395		Telogaster	-0.0357165	0.0347912	-1.02659	0.314848		Stegodexamene	0.0204917	0.105068	0.195033	0.850229
	Telogaster:Waihola	-0.0361121	0.0503937	-0.716599	0.478516		Stegodexamene	0.124642	0.0453145	2.7506	0.011*		Length	-0.0834759	0.131287	-0.635825	0.542647
	Stegodexamene:Hayes	0.130297	0.0541138	2.40784	0.022*		Length	-0.0343976	0.0217171	-1.58389	0.126308		Sex	-0.689978	0.688674	-1.00189	0.345733
	Stegodexamene:Waihola	0.051674	0.0686087	0.75317	0.456532		Sex	0.0815311	0.220099	0.370429	0.714312
	Length:Hayes	-0.0126981	0.0236539	-0.536829	0.594882
	Length:Waihola	-0.12379	0.0839381	-1.47477	0.149474
	Males:Hayes	0.11676	0.258153	0.45229	0.653933
	Females:Waihola	-0.599903	0.545735	-1.09926	0.279379
